# Supplementary material for: The Association Between β-Blocker Use and Cardiorespiratory Fitness: The Maastricht Study
Source: PubMed Central journal article supplement — J Cardiovasc Pharmacol Ther. 2018 May 24;24(1):37–45. doi: 10.1177/1074248418778551 (PMC6297897; doi:10.1177/1074248418778551), 2018-05-24
Supplement: Supplemental_file.pdf [file Supplemental_file.pdf]

**Supplementary Table 1: ATC-coding**

| <b>Group level</b>   | <b>Individual level</b> | <b>ATC codes</b>                                     | <b>1 DDD (mg)</b> |
|----------------------|-------------------------|------------------------------------------------------|-------------------|
| <b>Selective</b>     | <b>Nebivolol</b>        | C07AB12, C07BB12                                     | 5                 |
|                      | <b>Bisoprolol</b>       | C07AB07, C07AB57, C07BB07, C07FB07                   | 10                |
|                      | <b>Atenolol</b>         | C07AB03, C07BB03, C07CB03, C07CB53, C07DB01, C07FB03 | 75                |
|                      | <b>Metoprolol</b>       | C07AB02, C07AB52, C07BB02, C07BB52, C07CB02, C07FB02 | 150               |
| <b>Non-selective</b> | <b>Carvedilol</b>       | C07AG02                                              | 37.5              |
|                      | <b>Propranolol</b>      | C07AA05, C07BA05, C07FA05                            | 160               |
|                      | <b>Sotalol</b>          | C07AA07, C07AA57, C07BA07                            | 160               |
|                      | <b>Pindolol</b>         | C07AA03, C07CA03                                     | 15                |

**Supplementary Table 2:** Baseline characteristics of excluded populations due to missing values for exposure, covariates, and outcomes.

| <b>Characteristic</b>              | <b>Full study population<br/>n=3451</b> | <b>Excluded from<br/>6MWT analyses<br/>n=964</b> | <b>Excluded from<br/>cycling analyses<br/>n=1166</b> |
|------------------------------------|-----------------------------------------|--------------------------------------------------|------------------------------------------------------|
| Age, years (mean, SD)              | 59.8 (8.3)                              | 60.4 (8.4)                                       | 60.7 (8.4)                                           |
| Women (n, %)                       | 1676 (48.6)                             | 450 (46.7)                                       | 502 (43.1)                                           |
| BMI, kg m <sup>-1</sup> (mean, SD) | 27.1 (4.4)                              | 27.7 (4.9)                                       | 27.8 (4.9)                                           |
| T2DM†                              | 975 (28.3)                              | 367 (38.1)                                       | 429 (36.8)                                           |
| <b>Education (%)*</b>              |                                         |                                                  |                                                      |
| Low                                | 1133 (32.8)                             | 362 (37.6)                                       | 438 (37.6)                                           |
| Med                                | 953 (27.6)                              | 239 (24.8)                                       | 288 (24.7)                                           |
| High                               | 1288 (37.3)                             | 286 (29.7)                                       | 363 (31.1)                                           |
| Missing                            | 77 (2.2)                                | 77 (8.0)                                         | 77 (6.6)                                             |
| <b>Smoking status (%)</b>          |                                         |                                                  |                                                      |
| Never                              | 1170 (33.9)                             | 264 (27.4)                                       | 331 (28.4)                                           |
| Former                             | 1749 (50.7)                             | 456 (47.3)                                       | 570 (48.9)                                           |
| Current                            | 469 (13.6)                              | 181 (18.8)                                       | 202 (17.3)                                           |
| Missing                            | 63 (1.8)                                | 63 (6.5)                                         | 63 (5.4)                                             |

† Determined by an oral glucose tolerance test (OGTT). A fasting plasma glucose level of  $\geq 7.0$  mmol/l (126mg/dl) or a two-hour plasma glucose level  $\geq 11.1$  mmol/l (200mg/dl) were defined as T2DM according to the World Health Organisation (WHO) guidelines. Others were defined as non-T2DM.

\* Low=no education, primary education not completed, primary education, lower vocational education; medium = intermediate vocational education, higher secondary education; high = higher professional education, university education).

Abbreviations: SD = Standard Deviation, BMI = Body Mass Index, T2DM = Type 2 Diabetes

**Supplementary Table 3:** Cross-table of participants categorized into tertiles based on outcomes during six minute walk test and cycle ergometer test.

|                                                                                          | <b>6-minute walk<br/>test distance &lt;560<br/>meters</b> | <b>6-minute walk test<br/>distance 560-620<br/>meters</b> | <b>6-minute walk<br/>test distance &gt;620<br/>meters</b> |
|------------------------------------------------------------------------------------------|-----------------------------------------------------------|-----------------------------------------------------------|-----------------------------------------------------------|
|                                                                                          | <b>n=(%)</b>                                              | <b>n=(%)</b>                                              | <b>n=(%)</b>                                              |
| <b>Cycle test output <math>\leq 1.9</math><br/><math>W_{\max} \text{ kg}^{-1}</math></b> | 408 (59.13)                                               | 198 (27.58)                                               | 89 (12.43)                                                |
| <b>Cycle test output 1.9-<br/>2.37 <math>W_{\max} \text{ kg}^{-1}</math></b>             | 192 (27.83)                                               | 277 (38.58)                                               | 228 (31.84)                                               |
| <b>Cycle test output<br/><math>\geq 2.37 W_{\max} \text{ kg}^{-1}</math></b>             | 90 (13.04)                                                | 243 (33.84)                                               | 399 (55.73)                                               |

### Supplementary Text 1: Submaximal cycle ergometer test

In this study, the estimated maximum power output ( $W_{\max}$ ) was used as an objective measure of cardiorespiratory fitness (CRF).<sup>1,2,3</sup>  $W_{\max}$  was estimated from a graded submaximal exercise protocol performed on a cycle ergometer system (CASET<sup>TM</sup> version 6.6 in combination with e-bike, GE-Healthcare, Milwaukee, WI, USA). The protocol consisted of at most 7 two-minute exercise stages, with an increase in external work load of 25 W between stages. At the end of each stage, heart rate (HR) and rate of perceived exertion (RPE) were recorded. RPE was measured using the 15-point Borg scale, an interval scale ranging from 6 ('no exertion at all') up to 20 ('maximal exertion').<sup>4,5</sup> The exercise protocol was considered as 'completed' when HR reached  $\geq 85\%$  of the age-predicted maximum HR ( $220 - \text{age}$ ) or when a RPE  $\geq 17$  was scored by the participant (or when 7 stages were completed without reaching target HR or RPE).

A linear relationship between power output and HR and RPE was assumed<sup>2,6</sup>. Submaximal values of HR and RPE with workload from each stage were extrapolated to 100% of maximum HR or a RPE of 20 and corresponding workload ( $W_{\max}$ ) using individual linear regression models.  $W_{\max}$  was calculated from HR values if the test was completed based on HR, i.e. HR  $\geq 85\%$  of estimated HR<sub>max</sub> ( $W_{\max\text{HR}85\%}$ ; n=1,358).  $W_{\max}$  was calculated from RPE values if the test was completed based on RPE, i.e. RPE  $\geq 17$  ( $W_{\max\text{RPE}17}$ ; n=631). In addition to the completed tests,  $W_{\max}$  from uncompleted tests was calculated from HR if  $\geq 75\%$  of HR<sub>max</sub> was achieved ( $W_{\max\text{HR}75\%}$ ; n=667;  $W_{\max\text{HR}75\%} + W_{\max\text{HR}85\%} = W_{\max\text{HR}}$ ; n=2,025) and  $W_{\max}$  was calculated from RPE values if an RPE  $\geq 15$  was scored ( $W_{\max\text{RPE}15}$ ; n=798;  $W_{\max\text{RPE}15} + W_{\max\text{RPE}17} = W_{\max\text{RPE}}$ ; n=1,429). Tests where both 75% of HR<sub>max</sub> and RPE  $\geq 15$  were not achieved were considered as invalid. Both approaches (i.e. estimating  $W_{\max}$  from HR and RPE values) provide similar estimates of  $W_{\max}$ . Details on the protocol and procedures have been described previously.<sup>7</sup>

## Supplementary References

---

- <sup>1</sup> Storer TW, Davis JA, Caiozzo VJ. Accurate prediction of VO<sub>2</sub>max in cycle ergometry. *Med Sci Sports Exerc.* 1990 Oct;22(5):704-12.
- <sup>2</sup> Sartor F, Vernillo G, de Morree HM, Bonomi AG, La Torre A, Kubis HP, Veicsteinas A. Estimation of maximal oxygen uptake via submaximal exercise testing in sports, clinical, and home settings. *Sports Med.* 2013 Sep;43(9):865-73. doi: 10.1007/s40279-013-0068-3.
- <sup>3</sup> Billat V, Lopes P. Indirect methods for estimation of aerobic power. In: Maud PJ, Foster C, editors. *Physiological assessment of human fitness.* Champaign: Human Kinetics; 2006. p. 19–38.
- <sup>4</sup> Borg G. Perceived exertion as an indicator of somatic stress. *Scand J Rehabil Med.* 1970;2(2):92–8.
- <sup>5</sup> Borg G. *Borg's perceived exertion and pain scales.* Champaign: Human Kinetics;1998
- <sup>6</sup> Noonan V, Dean E. Submaximal exercise testing: clinical application and interpretation. *Phys Ther.* 2000 Aug;80(8):782-807
- <sup>7</sup> van der Velde JH, Koster A, van der Berg JD, Sep SJ, van der Kallen CJ, Dagnelie PC, Schram MT, Henry RM, Eussen SJ, van Dongen MC, Stehouwer CD, Schaper NC, Savelberg HH. Sedentary Behaviour, Physical Activity, and Fitness – The Maastricht Study . *Med Sci Sport Exerc,* 2017.
